# Supplementary material
Source: PubMed Central journal article supplement (PMC7331943)
Supplement: NIHMS1548532-supplement-1548532_SuppTable1-2.pdf [file NIHMS1548532-supplement-1548532_SuppTable1-2.pdf]

## Supplementary Information

**Supplementary table 1.** Diet composition comparing Fat free with open standard diet.

| Product #                             | D11112201          |             | D18012302      |             |
|---------------------------------------|--------------------|-------------|----------------|-------------|
|                                       | Open Standard Diet |             | Fat Free Diet  |             |
|                                       | gm%                | kcal%       | gm%            | kcal%       |
| <b>Protein</b>                        | 19                 | 20          | 18.5           | 22          |
| <b>Carbohydrate</b>                   | 63.1               | 65          | 67.3           | 78          |
| <b>Fat</b>                            | 6.5                | 15          | 0.0            | 0           |
| <b>Total</b>                          |                    | 100         |                | 100         |
| <b>kcal/gm</b>                        | 3.81               |             | 3.38           |             |
|                                       |                    |             |                |             |
| <b>Ingredient</b>                     | <b>gm</b>          | <b>kcal</b> | <b>gm</b>      | <b>kcal</b> |
| Casein                                | 200                | 800         | 220            | 880         |
| L-Cystine                             | 3                  | 12          | 3              | 12          |
|                                       |                    |             |                |             |
| Corn Starch                           | 381                | 1524        | 478.5          | 1914        |
| Maltodextrin 10                       | 110                | 440         | 150            | 600         |
| Dextrose                              | 150                | 600         | 150            | 600         |
|                                       |                    |             |                |             |
| Cellulose, BW200                      | 75                 | 0           | 125            | 0           |
| Inulin                                | 25                 | 37.5        | 25             | 37.5        |
|                                       |                    |             |                |             |
| Soybean Oil                           | 70                 | 630         | 0              | 0           |
| Lard                                  | 0                  | 0           | 0              | 0           |
|                                       |                    |             |                |             |
| Mineral Mix S10026                    | 10                 | 0           | 10             | 0           |
| Dicalcium Phosphate                   | 13                 | 0           | 13             | 0           |
| Calcium Carbonate                     | 5.5                | 0           | 5.5            | 0           |
| Potassium Citrate, 1 H <sub>2</sub> O | 16.5               | 0           | 16.5           | 0           |
|                                       |                    |             |                |             |
| Vitamin Mix V10001                    | 10                 | 40          | 10             | 40          |
| Choline Bitartrate                    | 2                  | 0           | 2              | 0           |
|                                       |                    |             |                |             |
| Yellow Dye #5, FD&C                   | 0.025              | 0           | 0.05           | 0           |
| Red Dye #40, FD&C                     | 0                  | 0           | 0              | 0           |
| Blue Dye #1, FD&C                     | 0.025              | 0           | 0              | 0           |
|                                       |                    |             |                |             |
| <b>Total</b>                          | <b>1071.05</b>     | <b>4084</b> | <b>1208.55</b> | <b>4084</b> |

**Supplementary Table 2** – Lipid composition of SPLASH LipidoMix™, which contains a mixture of all major lipid classes found in biological samples.

| Lipid Species           | Concentration (µg/mL) |
|-------------------------|-----------------------|
| PC(15:0_18:1{d7})       | 160.7                 |
| PE (15:0_18:1{d7})      | 50.8                  |
| PS(15:0_18:1{d7})       | 203.7                 |
| PG(15:0_18:1{d7})       | 29.1                  |
| PI(15:0_18:1{d7})       | 900.8                 |
| PA(15:0_18:1{d7})       | 357.4                 |
| LPC(18:1{d7})           | 25.5                  |
| LPE(18:1{d7})           | 95.0                  |
| CE(18:1{d7})            | 356.1                 |
| MAG(18:1{d7})           | 199.7                 |
| DAG(15:0_18:1{d7})      | 9.4                   |
| TAG(15:0_18:1{d7}_15:0) | 57.3                  |
| SM(18:1{d7})            | 30.9                  |
| Cer(15:0{d7})           | 19.7                  |
